# 1 **Recombination facilitates adaptive evolution in rhizobial soil bacteria**

2

3 Maria Izabel A. Cavassim<sup>1,2,+,\*</sup>, Stig U. Andersen<sup>2</sup>, Thomas Bataillon<sup>1</sup>, and Mikkel Heide  
4 Schierup<sup>1,\*</sup>

5

## 6 **Author affiliations:**

7 <sup>1</sup> Bioinformatics Research Centre, Aarhus University, Aarhus, 8000, Denmark

8 <sup>2</sup> Department of Molecular Biology and Genetics, Aarhus University, Aarhus, 8000, Denmark

9 <sup>+</sup>Present address: Department of Ecology and Evolutionary Biology, University of California, Los  
10 Angeles, 90095, United States

11

## 12 **\*Corresponding authors:**

13 Maria Izabel A. Cavassim, [izabelcavassim@gmail.com](mailto:izabelcavassim@gmail.com)

14 Mikkel H. Schierup, [mheide@birc.au.dk](mailto:mheide@birc.au.dk)

15

## 16 **Author Contributions**

17 **Conceptualization:** M.I.A.C., T.B., and M.H.S.; **Methodology:** M.I.A.C., T.B., and M.H.S.;

18 **Formal Analysis:** M.I.A.C.; **Investigation:** M.I.A.C., T.B., and M.H.S.; **Resources:** S.U.A., and

19 M.H.S.; **Data curation:** M.I.A.C., T.B., and M.H.S.; **Writing - Original Draft:** M.I.A.C.; **Writing**

20 **- Review and Editing:** M.I.A.C., S.U.A., T.B., and M.H.S.; **Visualization:** M.I.A.C., T.B. and

21 M.H.S. **Supervision:** T.B. and M.H.S.; **Project administration:** S.U.A. and M.H.S.; **Funding**

22 **acquisition:** S.U.A. and M.H.S.

23

## 24 **Competing interest**

25 The authors declare that they have no competing interests.

26

27 **Classification:** Biological Sciences and Evolution

28 **Keywords:** Adaptive evolution, rhizobium, recombination, beneficial mutations

29

## 30 **This PDF file includes:**

31 **Main Text**

32 **Figures 1 to 3**

33 **Tables 1 to 1**

34

35

## 36 **Abstract**

37 Homologous recombination is expected to increase natural selection efficacy by decoupling the  
38 fate of beneficial and deleterious mutations and by readily creating new combinations of beneficial  
39 alleles. Here, we investigate how the proportion of amino acid substitutions fixed by adaptive  
40 evolution ( $\alpha$ ) depends on the recombination rate in bacteria. We analyze 3086 core protein-coding  
41 sequences from 196 genomes belonging to five closely-related *Rhizobium leguminosarum*  
42 species. We find that  $\alpha$  varies from 0.07 to 0.39 across species and is positively correlated with  
43 the level of recombination. We then evaluate the impact of recombination within each species by  
44 dividing genes into three equally sized recombination classes based on their average level of  
45 intragenic linkage disequilibrium. Generally, we found a significant increase in  $\alpha$  with an increased  
46 recombination rate. This is both due to a higher estimated rate of adaptive evolution and a lower  
47 estimated rate of non-adaptive evolution, suggesting that recombination both increases the  
48 fixation probability of advantageous variants and decreases the probability of fixation of  
49 deleterious variants. Our results demonstrate that recombination facilitates adaptive evolution  
50 not only in eukaryotes, but also in prokaryotes. Adaptive evolution could thus be a selective force  
51 that universally promotes recombination.

52

## 53 **Significance statement**

54 Whether homologous recombination has a net beneficial or detrimental effect on adaptive  
55 evolution is largely unexplored in natural bacterial populations. We address this question by  
56 evaluating polymorphism and divergence data across 196 bacterial genome sequences of five  
57 closely-related *Rhizobium leguminosarum* species. We show that the proportion of amino acid  
58 changes fixed due to adaptive evolution ( $\alpha$ ) increases with an increased recombination rate. This  
59 correlation is observed both in the interspecies and intraspecific comparisons. These results  
60 suggest that homologous recombination directly impacts the efficacy of natural selection in  
61 prokaryotes, as it has been shown previously to be in eukaryotes.

## 62 Main text

### 63 Introduction

64 Genetic recombination is expected to facilitate adaptive evolution by increasing the fixation  
65 probability of adaptive mutations and decreasing the probability of fixation of deleterious  
66 mutations (1). This is because recombination decouples the fate of adaptive and deleterious  
67 variants, decreasing the amount of selective interference throughout the genome (2, 3). Selective  
68 interference—also termed as the Hill-Robertson (HR) effect—is expected to be strongest in  
69 regions of the genome where recombination is low (4). The HR effect is expected to cause: (i) a  
70 reduction in the number of neutral polymorphisms, (ii) the accumulation of slightly deleterious  
71 polymorphisms, and (iii) a decrease in the probability of fixation of advantageous alleles (see (5)).  
72 Homologous recombination is expected to mitigate the HR effect and increase the percentage of  
73 amino acid substitutions that are due to adaptive evolution ( $\alpha$ ).

74 Empirical evidence based on population genomics data supports these expectations with  
75 a positive correlation between recombination and  $\alpha$  reported in diverse species of eukaryotes,  
76 including flies (*Drosophila melanogaster* (6, 7)), fungi (*Zymoseptoria tritici* (8)), plants  
77 (*Arabidopsis thaliana* (9)), and non-model animal species (10, 11).

78 Whereas recombination is ubiquitous in eukaryotes, this is not the case for prokaryotes.  
79 Nevertheless, most studied prokaryotes show high rates of genetic exchange (12) and it is  
80 therefore of interest to explore whether such recombination also facilitates adaptive evolution in  
81 prokaryotes. Here we investigate adaptive evolution and recombination in a species complex of  
82 *Rhizobium leguminosarum* responsible for nitrogen fixation in white clover (*Trifolium repens*)  
83 nodules. We have previously reported the full genomic sequence of 196 isolates (13). Our  
84 analyses showed that they cluster into five closely related species (2-5% divergent) with horizontal  
85 gene transfer only affecting the nitrogen fixation genes and a few well-defined genomic regions.  
86 This species complex thus offers a unique opportunity among prokaryotes to estimate the rates  
87 of fixation of amino acid changes by adaptive evolution from isolates sampled from natural  
88 populations—enabling multiple comparisons of polymorphism and divergence patterns among  
89 species. Our analyses provide evidence that the rate of adaptive protein evolution increases with  
90 the recombination rate in this species complex.

91

## 92 Results & Discussion

93 To estimate the proportion of adaptive evolution ( $\alpha$ ) across this *Rhizobium* species  
94 complex, and study how  $\alpha$  covaries with recombination rate estimates, we restricted analyses to  
95 polymorphism data from regions of the core genome without evidence of horizontal gene transfer  
96 (HGT).

97 Across all five species (196 strains, gsA:32, gsB:32, gsC:112, gsD:5, gsE:11), a total of  
98 22115 orthologous genes were previously identified (13); of those, 4204 genes are present in all  
99 strains (core genes). Most core genes are found in the large chromosome (3304 genes), but some  
100 were located in the chromids (Rh01, Rh02) and in one of the plasmids (Rh03) (see (14), and (13)).  
101 The chromosome, chromids, and the plasmid are hereafter referred to as genomic compartments.  
102 We filtered out genes that showed evidence of interspecies HGT or unexpectedly high rates of  
103 nucleotide diversity (see Methods) (**Fig. S1**), leaving a total of 3086 genes (total alignment length:  
104 3091179) and 334040 variable sites for analysis (**Fig. S2**).

105 First, we estimated nucleotide diversity, intragenic linkage disequilibrium (LD), and the site  
106 frequency spectrum (SFS) (see Methods) within each species (**Fig. 1a-c**). The average nucleotide  
107 diversity,  $\pi$ , an estimator of  $2N_e\mu$  in haploids, is significantly different among genomic  
108 compartments (**Fig. 1a, Table S1**). Across the species,  $\pi$  differs by up to a factor of 4.5 (gsA:  
109 0.018, gsB:0.0045, gsC:0.0140, gsD:0.00512, gsE:0.008), with the most polymorphic species  
110 being gsA and the least gsB. If we assume similar mutation rates among these closely related  
111 species, nucleotide diversity differences reflect interspecies differences in long-term effective  
112 population size,  $N_e$ .

113 When recombination occurs, we expect that levels of non-random association between  
114 pairs of alleles, quantified by  $r^2$  (see Methods), decay with genomic distance (LD decay). To  
115 evaluate the recombination rate differences among the five species, we used within-species  
116 polymorphism data and computed the average intragenic LD decay for each gene in each  
117 species. We observed a rapid decay of LD within the first 1000 base pairs for all species,  
118 suggesting substantial amounts of within-species homologous recombination (**Fig. 1b**). The  
119 slower decay observed in species gsB either reflects a lower per generation recombination rate  
120 or a smaller effective population size ( $N_e$ ). The latter is consistent with the low level of nucleotide  
121 diversity measured in gsB. To reliably estimate interspecies differences in  $r^2$ , we used genes with  
122 at least ten informative sites within each species and evaluated their  $r^2$  distributions separately  
123 (**Fig. 1c**). As expected, the species with the most striking LD decay (gsC) has the lowest  $r^2$   
124 (median  $r^2$ : 0.248), and the opposite is also true (gsD, median  $r^2$ : 0.7131).

125 Species gsB and gsE have similar LD decay and  $r^2$  distributions (**Fig. 1b-c**). We tested  
126 whether their average  $r^2$  was statistically different. Based on the total number of shared genes  
127 (3086), the average  $r^2$  of gsB was not significantly different from the average  $r^2$  of gsE (Wilcox's  
128 test, p-value=0.10). All the other pairwise comparisons were statistically significant (**Table S2**).  
129 Thus, we considered gsB and gsE to have similar recombination rates. In summary, these species  
130 can be ranked by their recombination levels, from the most recombining to the least, as follows:  
131 gsC (median  $r^2$ : 0.248) > gsA (median  $r^2$ : 0.293) > gsB (median  $r^2$ : 0.48) and gsE (median  $r^2$ :  
132 0.43) > gsD (median  $r^2$ : 0.71).

133 Next, we computed the folded site frequency spectrum (SFS) of synonymous and  
134 nonsynonymous mutations within each species. Overall, both synonymous and nonsynonymous  
135 SFSs differ from the "L" shaped patterns (many rare alleles and fewer frequent alleles) expected  
136 in a stationary population at mutation-selection-drift equilibrium (**Fig. 1d**). The observed excess  
137 of intermediate frequency SNPs indicates the presence of population structure in some of the  
138 species. The effect of population structure is particularly evident in gsC, and this excess is likely  
139 driven by strains isolated from French soils (**Fig. S3**). Differences among species suggest distinct  
140 demographic histories, with gsC showing an SFS compatible with population expansion and gsA  
141 with population decline.

142 Using the counts of polymorphism in synonymous and nonsynonymous SFS within each  
143 species, we can estimate the overall strength of purifying selection via  $p_iN/p_iS$ . The strength of  
144 purifying selection ranks species similarly to their average recombination rate, with more  
145 recombining species showing stronger purifying selection (individual  $p_iN/p_iS$  are gsA = 0.039,  
146 gsB = 0.057, gsC = 0.037, gsD = 0.07, gsE = 0.051). This observation is in line with the theoretical  
147 expectation of a positive effect of recombination on the overall efficacy of natural selection. We  
148 also observed an excess of rare nonsynonymous relative to synonymous variants (**Fig. 1e**),  
149 consistent with the segregation of nonsynonymous variants under weak purifying selection (15).  
150 Rare nonsynonymous variants are often deleterious ( $s \sim 1/N_e$ ) (16, 17). Because deleterious  
151 variants contribute substantially to polymorphism but rarely to divergence (18, 19), their presence  
152 in the genomes, if not controlled for, will lead to an underestimation of  $\alpha$  (20).

153 We used GRAPES (10) to estimate the distribution of fitness effects (DFE) (21) and the  
154 proportion of adaptive evolution ( $\alpha$ ) from polymorphism and divergence data while accounting for  
155 the presence of deleterious mutations. This approach uses the site frequency distribution of both  
156 synonymous and nonsynonymous SFS counts to estimate the DFE while accounting for the effect  
157 of demography. The significant amount of shared polymorphism among species (**Table S3**)  
158 makes it difficult to reliably call ancestral and derived states (22, 23). Accordingly, we chose to

159 estimate the DFE and  $\alpha$  using the folded SFSs (10). To determine the model of the DFE that best  
160 fit our data, we used a variety of DFE distribution models (**Table S4**). The DFE models we tested  
161 differ by the classes of mutations (deleterious, beneficial, and neutral) included in each DFE  
162 model and how fitness effects are distributed within these classes. When using Akaike's  
163 Information Criterion (AIC) to select the best DFE model, we found the GammaZero model overall  
164 provides the best fit to the SFS data (**Fig. S4**). This model assumes the existence of weakly  
165 deleterious nonsynonymous mutations, modeled as a continuous Gamma distribution (10).

166 The proportion of adaptive evolution was first computed between all combinations of  
167 "mirror" species ( $\alpha_{species1\ species2}$ ), in which "species 2" is used as outgroup (divergence) for  
168 "species 1" (polymorphism), and vice-versa ( $\alpha_{species2\ species1}$ ). This yielded twenty combinations  
169 in total. Because "mirror" species share an identical history of divergence, their  $\alpha$  estimates can  
170 be considered as "biological replicates" (10) (**Table 1**). Except for the comparison between gsA  
171 and gsB, in which differences between  $\alpha_{gsA\ gsB}$  and  $\alpha_{gsB\ gsA}$  exceeded 0.1, the overall  
172 discrepancy in the values estimated between mirror species does not exceed 0.1. Using each  
173 species' focal polymorphism data, we calculated four  $\alpha$  estimates by comparing it to the  
174 divergence counts of the remaining species (**Table 1**). The most recombining species (gsC) is  
175 observed to have the highest  $\alpha$  across all outgroups used, while the least recombining species  
176 (gsD) had the lowest  $\alpha$  in  $\frac{3}{4}$  of the cases.

177 We then investigated whether intraspecies differences in recombination rate affect the  
178 amount of adaptive evolution ( $\alpha$ ). For each species, we split genes into three recombination  
179 classes based on their average  $r^2$  values and computed  $\alpha$  for each class using the GammaZero  
180 model (**Fig. S5, Table S5**). Because we only kept genes with at least ten informative sites, the  
181 number of genes evaluated across species was different (**Fig. 1c**). For most species comparisons  
182 (gsA, gsB, gsC, and gsE), there is a decrease in the proportion of adaptive evolution with a  
183 reduction in recombination (increase in  $r^2$ ). Except for cases in which we used gsD and gsB  
184 polymorphisms to estimate  $\alpha$ , all the other species pairwise comparisons led to at least one  
185 significant difference (based on non-overlapping CI's) between recombination classes. We further  
186 assessed the significance of the pattern reported here by permuting—200 times—across  
187 recombination classes (see Methods). Except for simulations in which gsD and gsB  
188 polymorphisms were used, all the other simulations led to significant differences (p-value  $\leq$   
189 0.025) among the two most extreme classes of recombination (**Fig. S6**).

190 The parameter  $\alpha$  can also be viewed as the relative proportion between the rate of amino  
191 acid changes fixed by positive selection ( $\omega_a$ ) and the rate of non-adaptive amino acid changes



192 ( $\omega_{na}$ ):  $\alpha = \omega_a / (\omega_a + \omega_{na})$ . Thus, an increase in  $\alpha$  with recombination could be due to either an  
193 increase in the rate of adaptive substitutions, a decrease in the rate of non-adaptive substitutions,  
194 or both. Figure 3 shows that  $\omega_a$  increases with recombination rate whereas  $\omega_{na}$  decreases with  
195 recombination rate for most combinations and that the quantitative effects are almost equal in  
196 magnitude. Thus, classes of genes evolving under higher recombination rates exhibited lower  
197 rates of non-adaptive substitution and increased rates of fixation of adaptive variation. This is  
198 exactly as predicted from selective interference theory (1, 3, 4).

199 To evaluate the robustness of these results, we computed an alternative measure of  
200 recombination ( $R/\theta$ ). We then made new recombination classes and evaluated its correlation with  
201  $\alpha$ .  $R/\theta$  measures the importance of recombination ( $R$ ), relative to mutation ( $\theta$ ) across sequences  
202 (24, 25). Although the per gene estimates of  $R/\theta$  are less variable than that of  $r^2$  (**Fig. S7**), these  
203 two measures are not independent (Pearson correlation ranged from 0.21 to 0.44) (**Fig. S7**). For  
204 most species comparisons, the trend between  $\alpha$  and recombination is still consistent: the higher  
205  $R/\theta$ , the higher  $\alpha$  is (**Fig. S8**).

## 206 Conclusion

207 We have found that five bacterial species within the species complex *R. leguminosarum*  
208 display different yet high levels of recombination. The estimates of  $\alpha$  ranged between 0.07 and  
209 0.39 among species. These estimates are lower than those based on 410 orthologs observed in  
210 *E. coli* (0.58, CI=0.45, 0.68) but close to earlier estimates from *S. enterica* (0.34, CI=0.14, 0.50)  
211 previously reported (19).

212 Levels of recombination correlate—both across and within species—with higher amounts  
213 of adaptive evolution measured either as the rate of adaptive substitutions ( $\omega_a$ ) or as the  
214 proportion of amino acid changes which have been fixed by positive selection ( $\alpha$ ). For instance,  
215 the most recombining species (gsC) consistently exhibited the largest  $\alpha$ , independent of the  
216 outgroup used. Within each species, we also find a positive correlation between intragenomic  
217 recombination rate and  $\alpha$ , as well as for  $\omega_a$ . These findings are robust to the measure of  
218 recombination ( $r^2$  and  $R/\theta$ ) and the choice of outgroup used for computing divergence.

219 The positive effect of homologous recombination on  $\alpha$  we report here is in line with  
220 population genetic studies conducted in vertebrates (10, 11) and invertebrates (7, 8, 26–29). It  
221 points to recombination being a general facilitator of adaptive evolution across the tree of life—  
222 possibly being a selective force for the existence of recombination in prokaryotes in the first place.

223

## 224 **Material and methods**

### 225 **Identification of orthologous genes**

226 We previously isolated and sequenced 196 strains from white clover (*Trifolium repens*)  
227 root nodules harvested in Denmark, France, and the UK. To identify a set of orthologous genes  
228 shared across strains, we followed the methods outlined in Cavassim et al., 2020 (13). Briefly,  
229 the strains were previously subjected to whole-genome shotgun sequencing using 2x250bp  
230 Illumina paired-end reads (Illumina, USA). Genomes were assembled using SPAdes (v. 3.6.2,  
231 (30)) and assembled further, one strain at a time, using a custom Python script (Jigome, available  
232 at [https://github.com/izabelcavassim/Rhizobium\\_analysis/tree/master/Jigome](https://github.com/izabelcavassim/Rhizobium_analysis/tree/master/Jigome)).

233 From the assembled genomes (13), we predicted protein-coding sequences using prokka  
234 (31) (v1.12); this resulted in a total of 1468264 protein-coding sequences. To predict orthologous  
235 genes from these sequences, we used Proteinortho (31, 32) (v5.16b) with default parameters  
236 except for enabling the synteny flag. We identified a total of 22115 orthologous, including a total  
237 of 17911 orthologous observed in at least two strains (accessory genes), and 4204 orthologous  
238 found in all 196 strains (core genes).

239 Genes were then aligned using clustalo (33) (v.1.2.0) in a codon-aware manner. To  
240 determine the genetic relationship among all 196 strains, we previously calculated their pairwise  
241 average nucleotide identity (ANI) across 305 conserved orthologous gene alignments (13). Under  
242 the 95% ANI threshold that delineates species boundaries (34), we demonstrated that these 196  
243 *Rhizobium* strains constitute five distinct *R. leguminosarum* species (gsA, gsB, gsC, gsD, and  
244 gsE). To ensure that we had a high-quality orthologous dataset for extracting segregating sites,  
245 we filtered it further (see below).

246

### 247 **Confident core orthologous genes**

248 By developing and applying a phylogenetic method to quantify HGT (introgression score),  
249 we previously showed that most of the core genes shared among the present species respect the  
250 species-tree topology (introgression score = 0) (13). The exceptions are genes sitting in the  
251 symbiosis conjugative plasmids, and two chromosomal islands (introgression score > 7). To  
252 ensure that we were only analyzing high-quality gene alignments with little evidence of HGT, we  
253 imposed some restrictions. We only accepted genes that passed the following criteria: (i) were  
254 present in every strain (196 strains), (ii) with a nucleotide diversity ( $\pi$ ) below 0.1, (iii) identifiable  
255 replicon origin (chromosome and chromids), (iiii) and with an introgression score  $\leq 3$  (**Fig. S1a**).  
256 A total of 3086 out of 4204 core genes were kept, and of these, 2550 genes were found in the



257 chromosome, 288 genes in chromid Rh01, 160 genes in chromid Rh02, and 88 genes in plasmid  
258 Rh03.

259

## 260 **Variant calling**

261 To identify single nucleotide polymorphisms (SNPs) along with our high-quality set of core  
262 genes, we evaluated each gene codon-aware alignment using a custom python script  
263 [https://github.com/izabelcavassim/Popgen\\_bacteria](https://github.com/izabelcavassim/Popgen_bacteria). For a given core gene alignment and  
264 position, we first counted the number of unique nucleotides (A, C, T, G). Only sites containing two  
265 unique nucleotides were considered variable sites (bi-allelic SNPs). SNP matrices were then built  
266 and encoded as follows: major alleles were encoded as 1 and minor alleles as 0. Gaps were  
267 replaced by the site mean. The nucleotide diversity ( $\pi$ ), gene length, and the distributions of  
268 segregating sites across core genes are described in **Fig. S1 (b-d)**.

## 269 **Transition transversion rate bias (kappa) and synonymous and** 270 **nonsynonymous counts**

271 Because transitions are more often synonymous at third codon positions than are  
272 transversions, to correctly identify the expected number of synonymous ( $Lps$ ) and  
273 nonsynonymous counts ( $Lpn$ ), we first estimated the average transition/transversion rate bias  
274 (kappa) (35) across species. To this end, we followed the methods described in (36) and used  
275 two classes of sites: fourfold-degenerate sites at the third codon positions and nondegenerate  
276 sites. Mutations at the fourfold-degenerate sites are synonymous, and therefore kappa at those  
277 sites should reflect only the mutational bias. All mutations at nondegenerate sites are  
278 nonsynonymous and were also used to estimate kappa. We computed an average kappa by  
279 combining these two classes based on equations 8, 9, 10, and 11 of Yang and Nielsen 2000 (36).  
280 These equations have been implemented within the CodonSeq class in Biopython (37) (private  
281 function `_count_site_YN00()`), and these private functions were adapted to our dataset.

282 To estimate a common kappa for each gene alignment (including all species and strains),  
283 we averaged estimates from pairwise analyses across 50 randomly chosen strains. The kappa  
284 distribution has a mean of 5.6 and a median of 5.20 (**Fig. S2a**), we used the median to compute  
285 the expected number of synonymous and nonsynonymous sites. To this end, we followed the  
286 methods described by Ina (1995) (35) and modified by Yang and Nielsen 2000 (36)—also  
287 implemented within Biopython. A total of 284742 synonymous, 49298 nonsynonymous sites were  
288 counted (**Fig. S2b-c**).

289

## 290 **Divergence sites and shared polymorphisms**

291 For each pair of species (a focal and an outgroup), we evaluated their variable sites and  
292 computed the number of shared synonymous ( $pS$ ) and nonsynonymous ( $pN$ ) polymorphisms.  
293 Given a bi-allelic SNP (0 and 1), we considered shared polymorphic sites as sites for which both  
294 alleles (0,1) were segregating in both species (**Table S3**). We restricted the estimates of  
295 divergence to those sites for which we had variable sites across species. We classified  
296 synonymous ( $d_S$ ) and nonsynonymous divergent sites ( $d_N$ ) as those sites in which we observed  
297 fixed differences between a focal species and an outgroup.

298

## 299 **Calculating the folded Site Frequency Spectrum**

300 One can infer the distribution of fitness effects from Site Frequency Spectrum (SFS) data  
301 (20). Because of the amount of shared polymorphism among the present species (**Table S3**), it  
302 becomes problematic to confidently distinguish ancestral from derived polymorphisms (38).  
303 Therefore, we chose to estimate the DFE using a method that uses the folded site frequency  
304 spectrums (SFS) of synonymous and nonsynonymous sites (10). To this end, we built the folded  
305 synonymous and nonsynonymous site frequency spectrums by tabulating the observed counts of  
306 the minor allele frequencies. The synonymous and nonsynonymous SFSs, and the divergence  
307 counts, were then used to estimate the DFE and the proportion of adaptive substitutions ( $\alpha$ )  
308 across pairs of species.

309

## 310 **Calculating the strength of purifying selection**

311 The strength of purifying selection was measured as the ratio of nucleotide diversity at  
312 nonsynonymous ( $pi_N$ ) and synonymous sites ( $pi_S$ ). For each gene and class of polymorphisms  
313 (synonymous and nonsynonymous) nucleotide diversity was computed as:  $\pi = \sum_1^m (2pq)/Lp$ , in  
314 which  $p$  and  $q$  are the allele frequencies, and  $Lp$  is the expected number of synonymous ( $Lps$ ) or  
315 nonsynonymous positions ( $Lpn$ ) along the gene. We use the median of the  $pi_N/pi_S$  distribution  
316 among genes as a proxy for the strength of purifying selection per species.

317

## 318 **Calculating the significance levels between recombination classes**

319 To test whether differences among recombination classes were statistically significant  
320 across species comparisons, we conducted a non-parametric test by shuffling genes among  
321 recombination classes (200 permutations) and recording the amplitude of differences between  $\alpha$

322 estimates ( $\Delta_\alpha = \max_\alpha - \min_\alpha$ ). We calculated a p-value by comparing the observed  $\Delta_\alpha$  against  
323 the simulated  $\Delta_\alpha$  distribution.

324

## 325 **Estimation of adaptive substitutions ( $\alpha$ )**

326 Fitted parameters of the DFE were used to compute the expected  $d_N/d_S$  under the  
327 different models, which was compared to the observed  $d_N/d_S$  to estimate the adaptive substitution  
328 rate ( $\omega_A$ ); non-adaptive substitution rate ( $\omega_{NA}$ ), and the proportion of adaptive substitutions ( $\alpha$ )  
329 with  $\omega_A = \alpha d_N/d_S$  and  $\omega_{NA} = (1 - \alpha) d_N/d_S$ .

330 To account for potential departures of the SFS from demographic equilibrium (assuming  
331 the Wright-Fisher model)—possibly driven by changes in the effective population size or by  
332 population structure—the method uses nuisance parameters to correct for these SFS distortions  
333 (39). The different DFE models were compared using the Akaike Information Criterion (AIC) (40).

334

## 335 **Recombination rate estimates**

336 To estimate the recombination rate per gene per species, we used two approaches: one  
337 based on the degree of association (or linkage disequilibrium) between pairs of alleles in a sample  
338 of haplotypes ( $r^2$ ), and another, ClonalFrameML (R/θ) (24, 25), which relies on the maximum  
339 likelihood inference to detect recombination events that disrupt a clonal pattern of inheritance in  
340 bacterial genomes.

### 341 **(1) Intragenic linkage disequilibrium**

342 Intragenic linkage disequilibrium (LD) measures the correlation between pairs of alleles  
343 with genomic distance. Here we used Pearson's  $r^2$  correlation measure.

344 Each gene genotype matrix (containing a minimal set of ten single nucleotide  
345 polymorphisms (SNPs)) was first normalized as follow: let  $N$  denote the total number of  
346 individuals, and  $M$  the total number of SNPs, the full gene genotype matrix ( $X$ ) has dimensions  
347  $N \times M$  with genotypes encoded as 0's and 1's for the  $N$  haploid individuals. Each column  $S_i$  ( $i =$   
348  $1, \dots, M$ ) of the  $X$  matrix is a vector of SNP information of size  $N$ . The first step of the calculation  
349 was to apply a Z-score normalization to each SNP vector by subtracting the vector by its mean  
350 and dividing it by its standard deviation ( $\frac{S_i - \bar{S}_i}{\sqrt{\text{var}(S_i)}}$ ), resulting in a vector with mean 0 and variance

351 1. The linkage disequilibrium was then calculated as a function of distance  $d$  (maximum 1000  
352 base pairs apart) and was computed as the average LD of pairs of SNPs  $d$  base pairs away from  
353 each other. The calculations were done in the following way:

354 
$$Cor(X_i, X_j) = \frac{Cov(X_i, X_j)}{\sqrt{var(X_i)var(X_j)}}$$

355 
$$r^2 = Cor(X_i, X_j)^2$$

356

357 In which  $j > i$  and  $X_i$  is composed of the genotypes of all individuals of a given species for SNP  
358 position  $i$  in the genotype matrix.  $X_j$  is formed of the genotypes of all individuals of the same  
359 species for position  $j$  in the genotype matrix, and  $d = j - i$  with  $d \leq 1000$  base pairs. Results  
360 were then summarized into bins of 100 base pairs apart; for each bin, a mean  $r^2$  was computed  
361 and then averaged to a singular  $r^2$  value.

## 362 (2) ClonalFrameML

363 To estimate the changes in the clonal phylogeny by recombination (R), relative to mutation  
364 ( $\theta$ ) ( $R/\theta$ ), we used the software ClonalFrameML (24, 25). For each species, we first concatenated  
365 all core gene alignments (3086 genes) to build the starting phylogenetic species-tree using a  
366 maximum likelihood approach (Raxml-ng (41, 42)). We then input each phylogenetic tree within  
367 each gene alignment to estimate  $R/\theta$ .

368

## 369 Data sharing plans

370 Code generated for this study can be found at  
371 [https://github.com/izabelcavassim/Popgen\\_bacteria](https://github.com/izabelcavassim/Popgen_bacteria)

372

## 373 Funding information

374 This work was funded by grant no. 4105-00007A from Innovation Fund Denmark (S.U.A. and  
375 M.H.S.).

376

## 377 Acknowledgments

378 The authors would like to thank industrial partners DLF Trifolium, SEGES, and Legume  
379 Technology Ltd. for their contribution to the field trials. The authors would also like to thank J.  
380 Peter W. Young, Paula Tataru, Bjarni Vilhjálmsson, and Marjolaine Rousselle for their helpful  
381 discussions about this work.

382  
383  
384

## 385 References

386

- 387 1. N. H. Barton, The reduction in fixation probability caused by substitutions at linked loci. *Genetical*  
388 *Research* **64**, 199–208 (1994).
- 389 2. W. G. Hill, A. Robertson, The effect of linkage on limits to artificial selection. *Genetical Research* **8**,  
390 269–294 (1966).
- 391 3. J. Felsenstein, The evolutionary advantage of recombination. *Genetics* **78**, 737–756 (1974).
- 392 4. G. A. McVean, B. Charlesworth, The effects of Hill-Robertson interference between weakly selected  
393 mutations on patterns of molecular evolution and variation. *Genetics* **155**, 929–944 (2000).
- 394 5. B. Charlesworth, A. J. Betancourt, V. B. Kaiser, I. Gordo, Genetic recombination and molecular  
395 evolution. *Cold Spring Harb. Symp. Quant. Biol.* **74**, 177–186 (2009).
- 396 6. D. Castellano, M. Coronado-Zamora, J. L. Campos, A. Barbadilla, A. Eyre-Walker, Adaptive  
397 Evolution Is Substantially Impeded by Hill-Robertson Interference in *Drosophila*. *Mol. Biol. Evol.* **33**,  
398 442–455 (2016).
- 399 7. J. L. Campos, D. L. Halligan, P. R. Haddrill, B. Charlesworth, The relation between recombination  
400 rate and patterns of molecular evolution and variation in *Drosophila melanogaster*. *Mol. Biol. Evol.*  
401 **31**, 1010–1028 (2014).
- 402 8. J. Grandaubert, J. Y. Dutheil, E. H. Stukenbrock, The genomic determinants of adaptive evolution in  
403 a fungal pathogen. *Evol Lett* **3**, 299–312 (2019).
- 404 9. A. F. Moutinho, F. F. Trancoso, J. Y. Dutheil, The Impact of Protein Architecture on Adaptive  
405 Evolution. *Mol. Biol. Evol.* **36**, 2013–2028 (2019).
- 406 10. N. Galtier, Adaptive Protein Evolution in Animals and the Effective Population Size Hypothesis. *PLoS*  
407 *Genet.* **12**, e1005774 (2016).
- 408 11. A. F. Moutinho, T. Bataillon, J. Y. Dutheil, Variation of the adaptive substitution rate between species  
409 and within genomes. *Evolutionary Ecology* **34**, 315–338 (2020).
- 410 12. X. Didelot, M. C. J. Maiden, Impact of recombination on bacterial evolution. *Trends Microbiol.* **18**,  
411 315–322 (2010).
- 412 13. M. I. A. Cavassim, *et al.*, Symbiosis genes show a unique pattern of introgression and selection  
413 within a *Rhizobium leguminosarum* species complex. *Microbial Genomics* **6** (2020).
- 414 14. Harrison, *et al.*, Introducing the bacterial “chromid”: not a chromosome, not a plasmid. *Trends*  
415 *Microbiol.* **18**, 141–148 (2010).
- 416 15. T. Ohta, Role of very slightly deleterious mutations in molecular evolution and polymorphism. *Theor.*  
417 *Popul. Biol.* **10**, 254–275 (1976).
- 418 16. A. L. Hughes, *et al.*, Widespread purifying selection at polymorphic sites in human protein-coding  
419 loci. *Proc. Natl. Acad. Sci. U. S. A.* **100**, 15754–15757 (2003).
- 420 17. A. L. Hughes, Evidence for abundant slightly deleterious polymorphisms in bacterial populations.  
421 *Genetics* **169**, 533–538 (2005).
- 422 18. J. C. Fay, G. J. Wyckoff, C. I. Wu, Positive and negative selection on the human genome. *Genetics*  
423 **158**, 1227–1234 (2001).

- 424 19. J. Charlesworth, A. Eyre-Walker, The rate of adaptive evolution in enteric bacteria. *Mol. Biol. Evol.*  
425 **23**, 1348–1356 (2006).
- 426 20. A. Eyre-Walker, P. D. Keightley, Estimating the rate of adaptive molecular evolution in the presence  
427 of slightly deleterious mutations and population size change. *Mol. Biol. Evol.* **26**, 2097–2108 (2009).
- 428 21. A. Eyre-Walker, P. D. Keightley, The distribution of fitness effects of new mutations. *Nature Reviews*  
429 *Genetics* **8**, 610–618 (2007).
- 430 22. P. Tataru, M. Mollion, S. Glémin, T. Bataillon, Inference of Distribution of Fitness Effects and  
431 Proportion of Adaptive Substitutions from Polymorphism Data. *Genetics* **207**, 1103–1119 (2017).
- 432 23. A. Schneider, B. Charlesworth, A. Eyre-Walker, P. D. Keightley, A method for inferring the rate of  
433 occurrence and fitness effects of advantageous mutations. *Genetics* **189**, 1427–1437 (2011).
- 434 24. M. Vos, X. Didelot, A comparison of homologous recombination rates in bacteria and archaea. *ISME*  
435 *J.* **3**, 199–208 (2009).
- 436 25. X. Didelot, D. J. Wilson, ClonalFrameML: efficient inference of recombination in whole bacterial  
437 genomes. *PLoS Comput. Biol.* **11**, e1004041 (2015).
- 438 26. D. C. Presgraves, Recombination enhances protein adaptation in *Drosophila melanogaster*. *Curr.*  
439 *Biol.* **15**, 1651–1656 (2005).
- 440 27. A. J. Betancourt, J. J. Welch, B. Charlesworth, Reduced effectiveness of selection caused by a lack  
441 of recombination. *Curr. Biol.* **19**, 655–660 (2009).
- 442 28. J. R. Arguello, *et al.*, Recombination Yet Inefficient Selection along the *Drosophila melanogaster*  
443 Subgroup's Fourth Chromosome. *Molecular Biology and Evolution* **27**, 848–861 (2010).
- 444 29. T. F. C. Mackay, *et al.*, The *Drosophila melanogaster* Genetic Reference Panel. *Nature* **482**, 173–  
445 178 (2012).
- 446 30. A. Bankevich, *et al.*, SPAdes: A New Genome Assembly Algorithm and Its Applications to Single-Cell  
447 Sequencing. *Journal of Computational Biology* **19**, 455–477 (2012).
- 448 31. T. Seemann, Prokka: rapid prokaryotic genome annotation. *Bioinformatics* **30**, 2068–2069 (2014).
- 449 32. M. Lechner, *et al.*, Orthology detection combining clustering and synteny for very large datasets.  
450 *PLoS One* **9**, e105015 (2014).
- 451 33. F. Sievers, *et al.*, Fast, scalable generation of high-quality protein multiple sequence alignments  
452 using Clustal Omega. *Mol. Syst. Biol.* **7**, 539 (2011).
- 453 34. K. T. Konstantinidis, A. Ramette, J. M. Tiedje, The bacterial species definition in the genomic era.  
454 *Philos. Trans. R. Soc. Lond. B Biol. Sci.* **361**, 1929–1940 (2006).
- 455 35. Y. Ina, New methods for estimating the numbers of synonymous and nonsynonymous substitutions.  
456 *J. Mol. Evol.* **40**, 190–226 (1995).
- 457 36. Z. Yang, R. Nielsen, Estimating synonymous and nonsynonymous substitution rates under realistic  
458 evolutionary models. *Mol. Biol. Evol.* **17**, 32–43 (2000).
- 459 37. P. J. A. Cock, *et al.*, Biopython: freely available Python tools for computational molecular biology and  
460 bioinformatics. *Bioinformatics* **25**, 1422–1423 (2009).
- 461 38. R. D. Hernandez, S. H. Williamson, C. D. Bustamante, Context dependence, ancestral  
462 misidentification, and spurious signatures of natural selection. *Mol. Biol. Evol.* **24**, 1792–1800 (2007).



- 463 39. A. Eyre-Walker, M. Woolfit, T. Phelps, The distribution of fitness effects of new deleterious amino  
464 acid mutations in humans. *Genetics* **173**, 891–900 (2006).
- 465 40. H. Akaike, Information Theory and an Extension of the Maximum Likelihood Principle. *Springer*  
466 *Series in Statistics*, 610–624 (1992).
- 467 41. K. Kobert, T. Flouri, A. Aberer, A. Stamatakis, The Divisible Load Balance Problem and Its  
468 Application to Phylogenetic Inference. *Lecture Notes in Computer Science*, 204–216 (2014).
- 469 42. A. Stamatakis, RAxML version 8: a tool for phylogenetic analysis and post-analysis of large  
470 phylogenies. *Bioinformatics* **30**, 1312–1313 (2014).

471

472

473

474

475

476

477

478

479

480

481

482

483

484

485

486

487

488

489

490

491

492

493

494

495 **Figures and Tables**

496

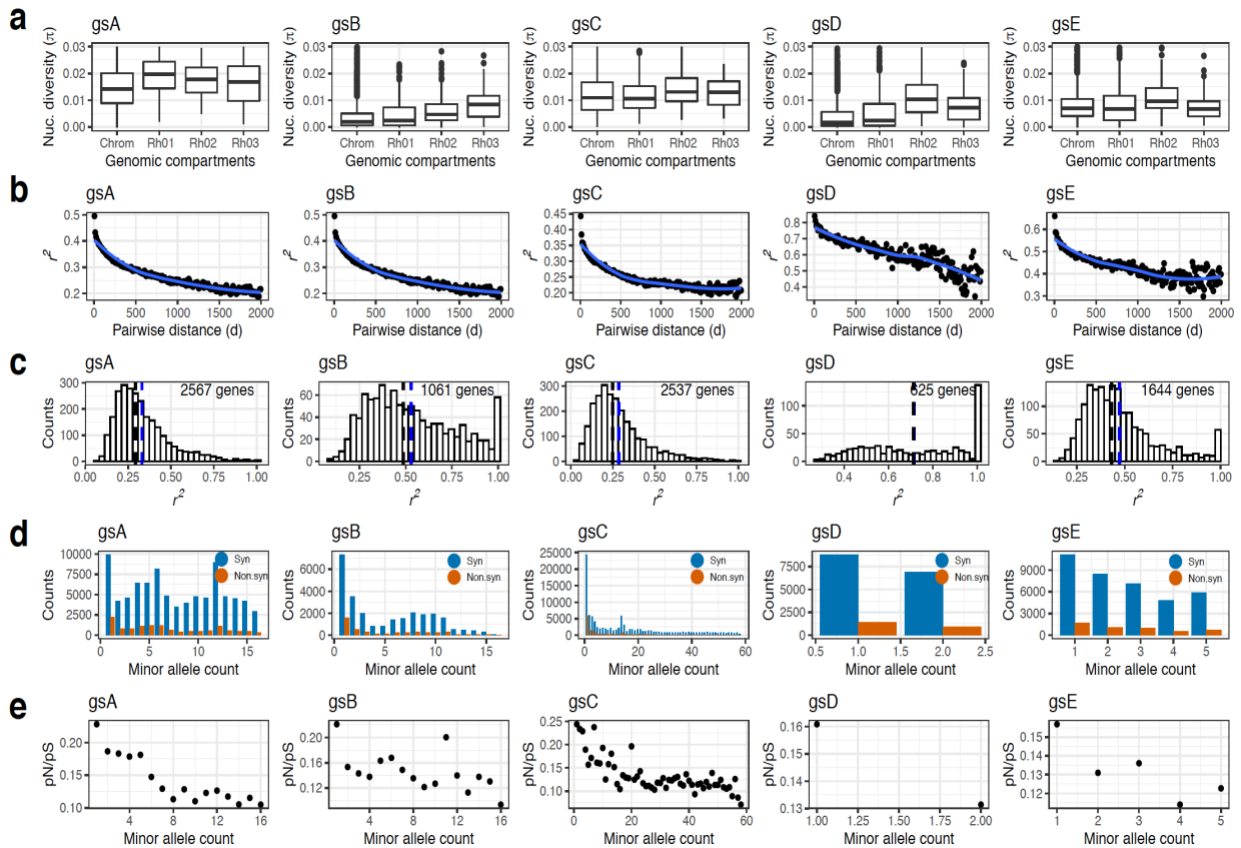

497

498

499 **Figure 1. Population genetics parameters across five species. (a)** Nucleotide diversity ( $\pi$ )

500 across 3086 genes distributed along with genomic compartments (chromosome and chromids:

501 Rh01, Rh02, and Rh03). To exclude outliers only genes with  $\pi \leq 0.03$  are shown. **(b)** Intragenic

502 linkage disequilibrium measured via the decay of  $r^2$  for all core genes (3086 genes). The curve

503 fitting line (in blue) is from a local regression method (loess). **(c)** Linkage disequilibrium ( $r^2$ )

504 distribution across genes. Only genes with at least ten segregating sites were kept (gsA: 2567

505 genes, gsB: 1061, gsC: 2537, gsD: 625, and gsE: 1644). The black and blue dashed lines

506 correspond to the median and mean  $r^2$ , respectively. **(d)** Site frequency spectrum counts of

507 synonymous and non-synonymous sites by minor allele count based on all core genes (3086

508 genes). **(e)** The ratio of non-synonymous to synonymous polymorphisms by minor allele count.

509

510

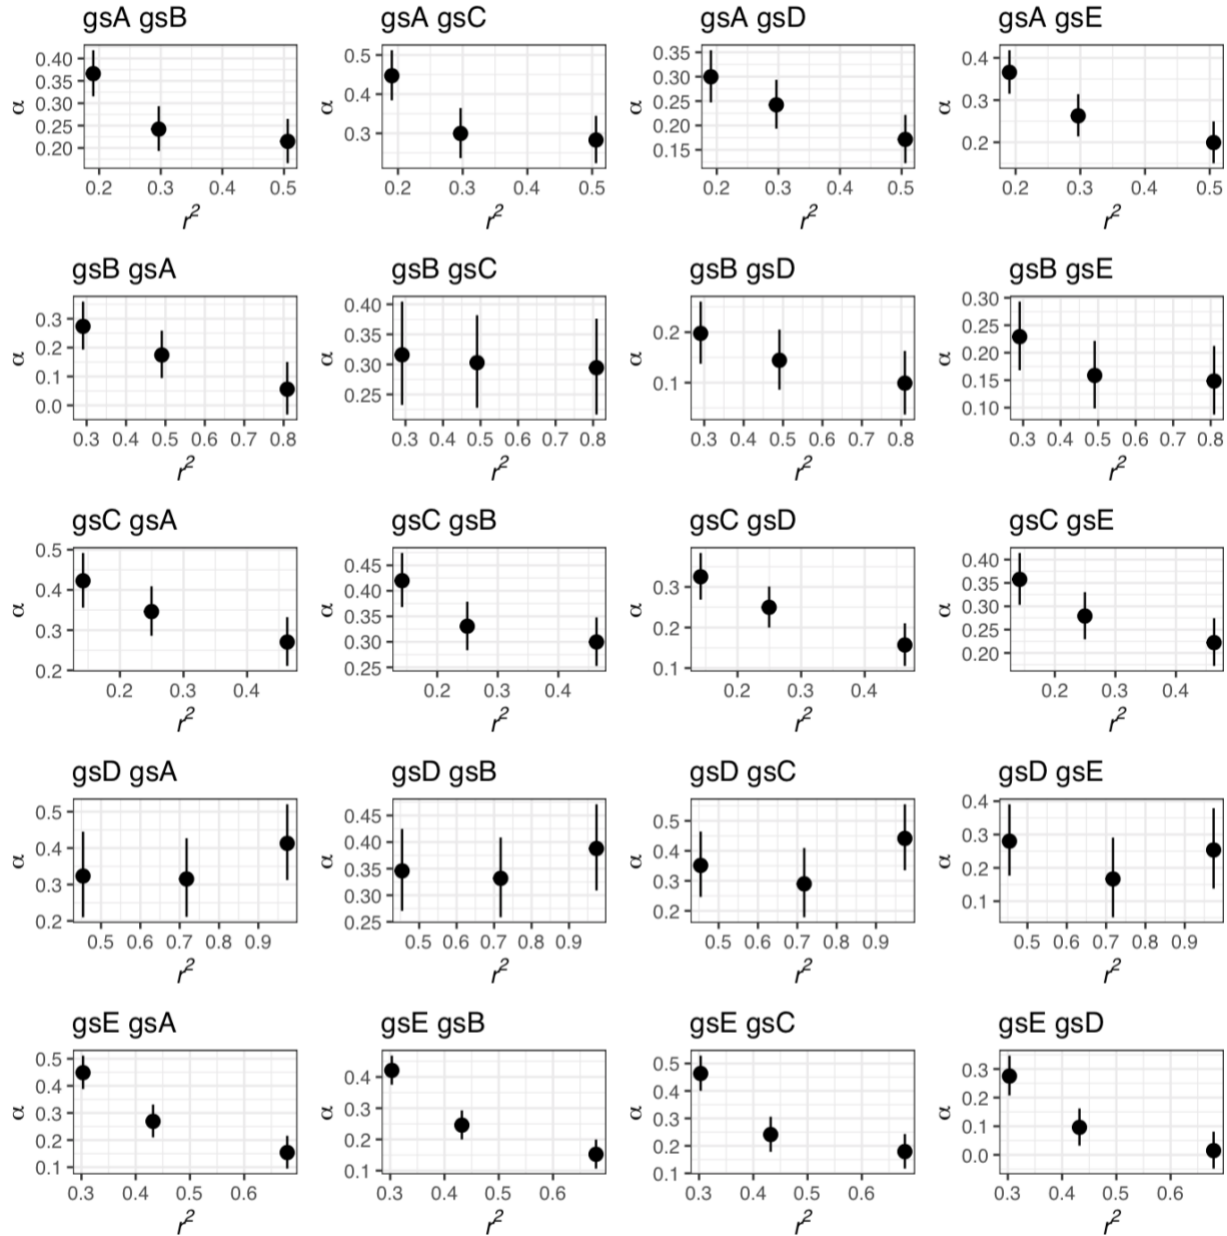

511

512

513 **Figure 2. The proportion of adaptive evolution ( $\alpha$ ) by classes of recombination.** For each  
514 pairwise estimates of  $\alpha$  the polymorphism data from one species (left in title) is compared against  
515 the divergence counts of an outgroup (right in title), and vice-versa. Results are divided into  
516 classes of recombination based on  $r^2$  (a measure that is inversely proportional to the level of  
517 recombination). The  $\alpha$  estimates and their associated confidence intervals were obtained using  
518 the best fitting DFE model (GammaZero).

519

520

521

522

523

524

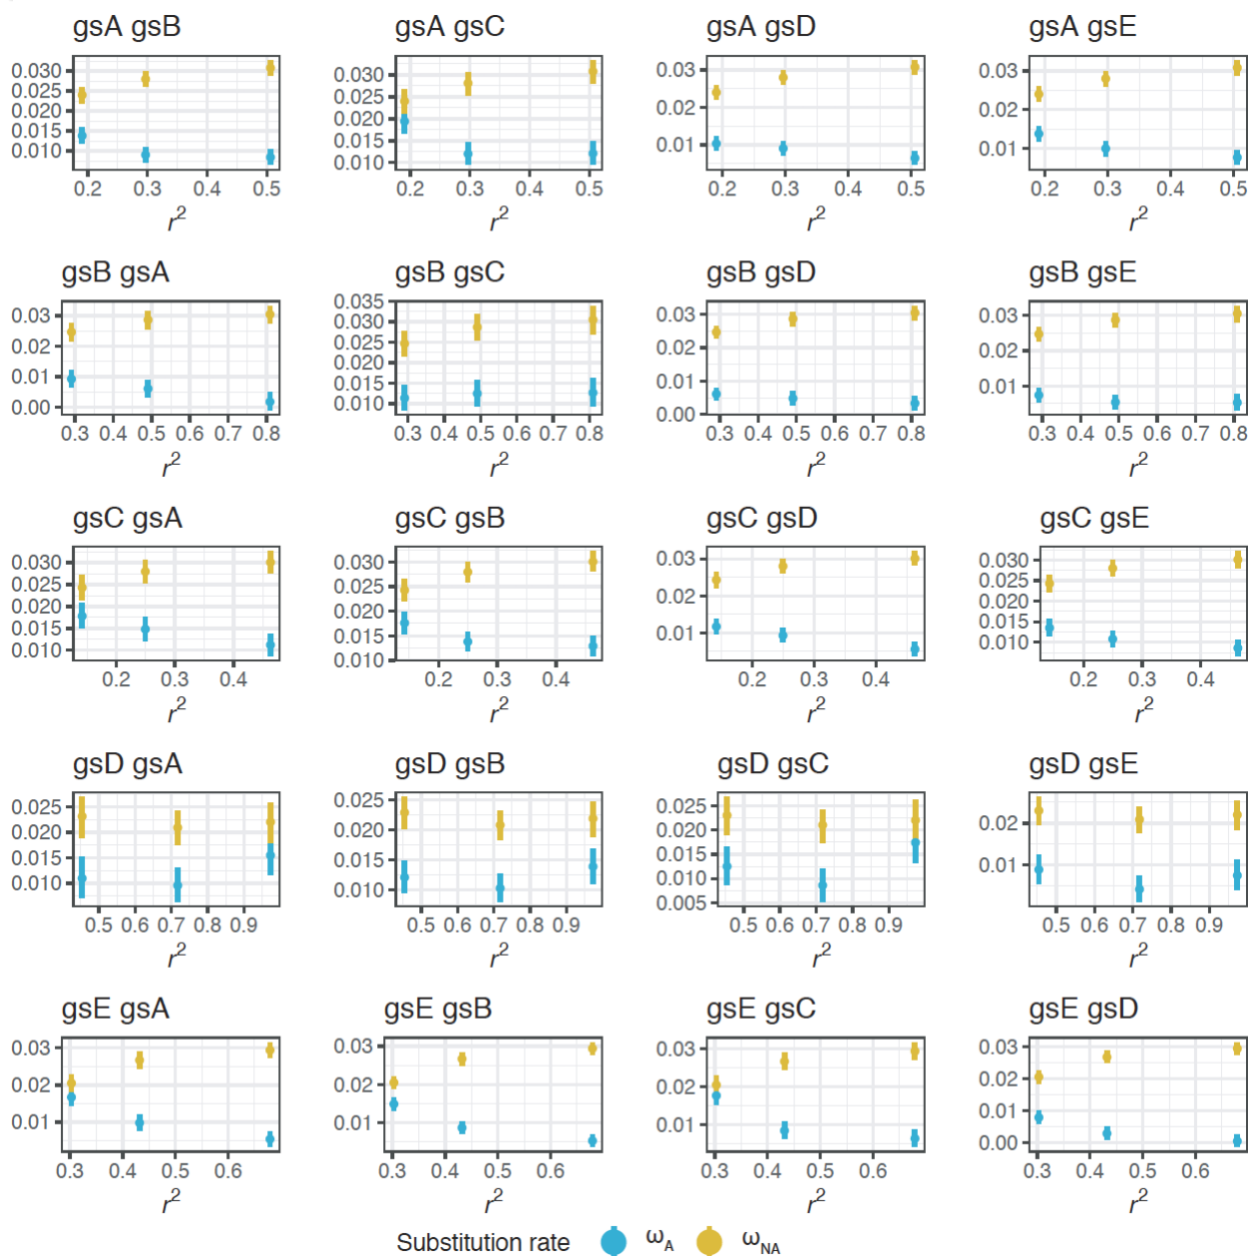

525

526

527 **Figure 3. The rates of adaptive ( $\omega_A$ ) and non-adaptive ( $\omega_{NA}$ ) evolution by classes of**  
 528 **recombination.** For each pairwise estimates of  $\omega_A$  (in blue) and  $\omega_{NA}$  (in yellow) the polymorphism  
 529 data from one species (left in title) is compared against the divergence counts of an outgroup  
 530 (right in title), and vice-versa. Results are divided into classes of recombination based on  $r^2$  (a  
 531 measure that is inversely proportional to the level of recombination). An opposite effect of  
 532 recombination on  $\omega_A$  and  $\omega_{NA}$  is observed in most pairwise comparisons. The estimates ( $\omega_A$ ,  
 533  $\omega_{NA}$ ) and their associated confidence intervals were obtained using the best fitting DFE model  
 534 (GammaZero).

535

536 **Table 1. The proportion of adaptive evolution ( $\alpha$ ) across pairs of species.** The  $\alpha$  estimates  
 537 were computed based on the best fitting DFE model (GammaZero) (**Table S4**). For each pairwise  
 538 estimate of  $\alpha$  ( $\alpha_{species1\ species2}$ ), the polymorphism data from a focal species (rows) is compared  
 539 against the divergence counts of an outgroup (columns), and vice-versa ( $\alpha_{species2\ species1}$ ).  
 540 Confidence intervals are displayed in brackets (grey) and numbers in parentheses represent the  
 541  $\alpha$  ranking (in decreasing order) by outgroup (by column).  
 542

| Polymorphism (focal) | Divergence (outgroup)             |                                   |                                   |                                   |                                   |
|----------------------|-----------------------------------|-----------------------------------|-----------------------------------|-----------------------------------|-----------------------------------|
|                      | gsA                               | gsB                               | gsC                               | gsD                               | gsE                               |
| gsA                  | -                                 | <b>0.28</b><br>[0.26-0.31]<br>(2) | <b>0.35</b><br>[0.33-0.39]<br>(1) | <b>0.25</b><br>[0.23-0.28]<br>(1) | <b>0.29</b><br>[0.27-0.32]<br>(2) |
| gsB                  | <b>0.18</b><br>[0.16-0.21]<br>(4) | -                                 | <b>0.26</b><br>[0.24-0.29]<br>(3) | <b>0.15</b><br>[0.13-0.17]<br>(3) | <b>0.17</b><br>[0.15-0.19]<br>(3) |
| gsC                  | <b>0.36</b><br>[0.33-0.39]<br>(1) | <b>0.36</b><br>[0.33-0.38]<br>(1) | -                                 | <b>0.25</b><br>[0.23-0.28]<br>(1) | <b>0.30</b><br>[0.27-0.32]<br>(1) |
| gsD                  | <b>0.25</b><br>[0.22-0.28]<br>(3) | <b>0.25</b><br>[0.23-0.27]<br>(4) | <b>0.25</b><br>[0.22-0.28]<br>(4) | -                                 | <b>0.12</b><br>[0.10-0.15]<br>(4) |
| gsE                  | <b>0.27</b><br>[0.24-0.30]<br>(2) | <b>0.25</b><br>[0.23-0.27]<br>(4) | <b>0.27</b><br>[0.24-0.30]<br>(2) | <b>0.10</b><br>[0.07-0.13]<br>(4) | -                                 |

543  
 544
